# Supplementary material
Source: ML conference proceedings conference paper supplement (https://openaccess.thecvf.com/content/CVPR2023/html/Gong_MMG-Ego4D_Multimodal_Generalization_CVPR_2023_paper.html)
Supplement: Supplementary file 1 [file Gong_MMG-Ego4D_Multimodal_Generalization_CVPR_2023_supplemental.zip]

Archive with 3 entries (3 files):
- Multimodal_Few_Shot_Paper_final_supp.pdf
- __MACOSX/._Multimodal_Few_Shot_Paper_final_supp.pdf
- class_name.json
