# Supplementary material
Source: ML conference proceedings conference paper supplement (https://openaccess.thecvf.com/content/CVPR2023/html/Gong_MMG-Ego4D_Multimodal_Generalization_CVPR_2023_paper.html)
Supplement: Supplementary file 1 [file Gong_MMG-Ego4D_Multimodal_Generalization_CVPR_2023_supplemental.zip › class_name.json]

{"base": ["use_phone", "converse_/_interact_with_someone", "use_a_laptop_/_computer", "cut_/_trim_grass_with_a_lawnmower", "play_a_video_game", "cut_/_trim_grass_with_other_tools", "\"cut_/_chop_/_slice_a_vegetable,_fruit,_or_meat\"", "remove_weeds_from_ground", "watch_television", "tie_up_branches_/_plants_with_string", "wash_dishes_/_utensils_/_bakeware_etc.", "clean_/_sweep_floor_with_broom", "clean_/_wipe_other_surface_or_object", "iron_clothes_or_sheets", "hang_clothes_to_dry", "use_a_vacuum_cleaner_to_clean", "trim_hedges_or_branches", "stir_/_mix_food_while_cooking", "eat_a_snack", "serve_food_onto_a_plate", "cut_other_item_using_tool", "walk_down_stairs_/_walk_up_stairs", "fold_clothes_/_sheets", "read_a_book_/_magazine_/_shopping_list_etc.", "stir_/_mix_ingredients_in_a_bowl_or_pan_(before_cooking)", "harvest_vegetables_/_fruits_/_crops_from_trees", "dig_or_till_the_soil_with_a_hoe_or_other_tool", "cut_tree_branch", "put_away_(or_take_out)_dishes_/_utensils_in_storage", "harvest_vegetables_/_fruits_/_crops_from_plants_on_the_ground", "pack_soil_into_the_ground_or_a_pot_/_container", "load_/_unload_a_washing_machine_or_dryer", "throw_away_trash_/_put_trash_in_trash_can", "fry_other_food_item", "drink_beverage", "\"make_the_bed_/_arrange_pillows,_sheets_etc._on_bed\"", "put_away_(or_take_out)_food_items_in_the_fridge", "water_soil_/_plants_/_crops", "plant_seeds_/_plants_/_flowers_into_ground", "wash_hands", "fix_wiring", "chop_/_cut_wood_pieces_using_tool", "hang_clothes_in_closet_/_on_hangers", "arrange_/_organize_other_items", "knead_/_shape_/_roll-out_dough", "boil_some_other_food_item", "fill_a_pot_/_bottle_/_container_with_water", "rinse_/_drain_other_food_item_in_sieve_/_colander", "peel_a_fruit_or_vegetable", "arrange_/_organize_clothes_in_closet/dresser", "collect_/_rake_dry_leaves_on_ground", "wash_vegetable_/_fruit_/_food_item", "paint_using_paint_brush_/_roller", "fix_other_item", "\"put_on_safety_equipment_(e.g._gloves,_helmet,_safety_goggles)\"", "apply_fertilizer_/_pesticide_with_sprayer", "pack_other_items_into_bags_/_boxes", "cut_open_a_package_(e.g._with_scissors)", "blend_ingredients_using_an_electric_blender", "\"clean_/_repair_small_equipment_(mower,_trimmer_etc.)\"", "clean_/_wipe_a_table_or_kitchen_counter", "take_photo_/_record_video_with_a_camera", "use_other_kitchen_appliance", "pack_food_items_/_groceries_into_bags_/_boxes", "put_away_(or_take_out)_ingredients_in_storage"], "novel": ["mop_the_floor", "use_the_microwave_/_warm_something_in_the_microwave", "spread_cheese_/_jelly_/_butter_/_etc._on_bread", "operate_a_water_hose", "move_/_shift_/_arrange_small_tools", "drill_into_wall_/_wood_/_floor_/_metal", "browse_through_clothing_items_on_rack_/_shelf_/_hanger", "arrange_/_organize_items_in_fridge", "make_coffee_or_tea_/_use_a_coffee_machine", "put_food_into_the_oven_to_bake", "write_notes_in_a_paper_/_book", "clean_/_wipe_kitchen_appliance", "interact_or_play_with_pet_/_animal"]}
